# Supplementary material for: Isolation and Molecular Characterization of Plant-Growth-Promoting Bacteria and Their Effect on Eggplant (Solanum melongena) Growth
Source: MDPI journal article supplement (doi:10.3390/agriculture11121258), 2021-12-12
Supplement: s1 [file s1]

**Table S1** The reference sequences of *Pantoea* closely related species were downloaded from GenBank database.

| Species                           | Strains                | GenBank NO.     |                 |                 |                 |
|-----------------------------------|------------------------|-----------------|-----------------|-----------------|-----------------|
|                                   |                        | <i>infB</i>     | <i>rpoB</i>     | <i>gyrB</i>     | <i>atpD</i>     |
| <i>Pantoea agglomerans</i>        | LMG 1286 <sup>T</sup>  | EF988884        | EF988970        | EF988798        | EF988711        |
| <i>P. allii</i>                   | LMG 24248 <sup>T</sup> | LT708187        | KF482744        | LT708165        | LT708148        |
| <b><i>P. ananatis</i></b>         | LMG 2665 <sup>T</sup>  | EF988910        | KF482748        | FJ617371        | EF988737        |
|                                   | LMG 20106              | EF988887        | EF988973        | EF988801        | EF988714        |
|                                   | LMG 2676               | EF988914        | EF989000        | EF988828        | EF988741        |
|                                   | <b>ZJ3-12</b>          | <b>OK255684</b> | <b>OK255695</b> | <b>OK255682</b> | <b>OK255674</b> |
| <i>P. anthophila</i>              | LMG 2558 <sup>T</sup>  | EF988898        | EF988984        | EF988812        | EF988725        |
| <i>P. brenneri</i>                | LMG 5343 <sup>T</sup>  | EU145286        | EU145302        | EU145270        | EU145254        |
| <i>P. calida</i>                  | 1400/07                | GQ367476        | GQ367479        | GQ367480        | GQ367477        |
| <i>P. citrea</i>                  | LMG 22049 <sup>T</sup> | EF988888        | EF988974        | EF988802        | EF988715        |
| <i>P. conspicua</i>               | LMG 24534 <sup>T</sup> | EU145285        | EU145301        | EU145269        | EU145253        |
| <i>P. cypripedii</i>              | LMG 2657 <sup>T</sup>  | FJ187835        | FJ187840        | FJ187830        | FJ187825        |
| <i>P. deleyi</i>                  | LMG 24200 <sup>T</sup> | EF988856        | EF988942        | EF988770        | EF988683        |
| <b><i>P. dispersa</i></b>         | LMG 2603 <sup>T</sup>  | EF988904        | EF988990        | EF988818        | EF988731        |
|                                   | AMG 153                | KT429232        | KT735148        | KT203543        | KT203517        |
|                                   | <b>ZJ62</b>            | <b>OK255685</b> | <b>OK255696</b> | <b>OK255683</b> | <b>OK255675</b> |
| <i>P. eucalyptii</i>              | LMG 24197 <sup>T</sup> | EF988848        | EF988934        | EF988762        | EF988675        |
| <i>P. eucrina</i>                 | LMG 2781 <sup>T</sup>  | EU145287        | EU145303        | EU145271        | EU145255        |
| <i>P. gaviniae</i>                | A18/07                 | GQ367481        | GQ367484        | GQ367485        | GQ367482        |
| <i>P. punctata</i>                | LMG 22050 <sup>T</sup> | EF988889        | EF988975        | EF988803        | EF988716        |
| <i>P. rodasii</i>                 | LMG 26273 <sup>T</sup> | JF295033        | JF295043        | JF295023        | JF295013        |
| <i>P. rwandensis</i>              | LMG 26275 <sup>T</sup> | JF295040        | JF295050        | JF295030        | JF295020        |
| <i>P. septica</i>                 | LMG 5345 <sup>T</sup>  | EU145288        | EU145304        | EU145272        | EU145256        |
| <i>P. stewartii</i>               | LMG 2715 <sup>T</sup>  | EF988917        | EF989003        | EF988831        | EF988744        |
| <i>P. terreia</i>                 | LMG 22051 <sup>T</sup> | EF988890        | EF988976        | EF988804        | EF988717        |
| <i>P. vagans</i>                  | LMG 24199 <sup>T</sup> | EF988854        | EF988940        | EF988768        | EF988681        |
| <i>P. wallisii</i>                | LMG 26277 <sup>T</sup> | JF295041        | JF295051        | JF295031        | JF295021        |
| <i>Pectobacterium carotovorum</i> | LMG 2404 <sup>T</sup>  | KJ818416        | HM359006        | KJ818410        | KJ818389        |

**Table S2.** The reference sequences of each *Burkholderia* species were downloaded from the Bcc multilocus sequence typing website.

|                          |     |                         |                     |              | Allelic profile <sup>a</sup> |                 |                 |                 |                 |                 |                 |
|--------------------------|-----|-------------------------|---------------------|--------------|------------------------------|-----------------|-----------------|-----------------|-----------------|-----------------|-----------------|
| Strain group or ST       |     | Strain                  | Source <sup>b</sup> | Origin       | <i>atpD</i>                  | <i>gltB</i>     | <i>gyrB</i>     | <i>recA</i>     | <i>lepA</i>     | <i>phaC</i>     | <i>trpB</i>     |
| <i>B. ambifaria</i>      | 483 | AU0216                  | CF                  | USA          | 71                           | 47              | 126             | 26              | 292             | 209             | 112             |
| <i>B. anthina</i>        | 141 | AU5925                  | CF                  | USA          | 43                           | 33              | 319             | 33              | 21              | 21              | 30              |
| <i>B. arboris</i>        | 474 | AU1125                  | NON                 | USA          | 240                          | 268             | 388             | 168             | 27              | 72              | 208             |
|                          |     | <b>ZJ5</b>              | <b>Soil</b>         | <b>China</b> | <b>OK255671</b>              | <b>OK255676</b> | <b>OK255679</b> | <b>OK255692</b> | <b>OK255686</b> | <b>OK255689</b> | <b>OK255697</b> |
| <i>B. caledonica</i>     | 497 | LMG 19076 <sup>T</sup>  | ENV                 | UK           | 261                          | 288             | 426             | 271             | 323             | 230             | 286             |
| <i>B. caribensis</i>     | 498 | LMG 18531 <sup>T</sup>  | ENV                 | Martinique   | 262                          | 289             | 427             | 272             | 324             | 231             | 287             |
| <i>B. cenocepacia</i>    | 209 | AU8898                  | CF                  | USA          | 129                          | 11              | 9               | 14              | 11              | 6               | 147             |
| <i>B. cenocepacia</i>    | 225 | AU0208                  | CF                  | USA          | 94                           | 16              | 176             | 69              | 68              | 46              | 139             |
| <i>B. cenocepacia</i>    | 478 | AU6099                  | CF                  | USA          | 17                           | 15              | 393             | 19              | 68              | 41              | 13              |
| <i>B. cepacia</i>        | 12  | HI2722                  | ENV                 | Canada       | 72                           | 53              | 46              | 73              | 34              | 38              | 51              |
| <i>B. contaminans</i>    | 532 | AU0059                  | CF                  | USA          | 89                           | 216             | 384             | 245             | 289             | 98              | 300             |
| <i>B. diffusa</i>        | 495 | HI3672 <sup>T</sup>     | ENV                 | USA          | 259                          | 284             | 422             | 267             | 320             | 227             | 282             |
| <i>B. dolosa</i>         | 472 | AU0158                  | CF                  | USA          | 30                           | 21              | 18              | 24              | 291             | 13              | 20              |
| <i>B. fungorum</i>       | 485 | AU11628                 | NON                 | USA          | 249                          | 275             | 406             | 256             | 305             | 216             | 274             |
| <i>B. gladioli</i>       | 554 | AU10372                 | CF                  | USA          | 223                          | 308             | 404             | 254             | 303             | 214             | 261             |
| <i>B. glathei</i>        | 500 | ATCC 29195 <sup>T</sup> | ENV                 | Germany      | 264                          | 291             | 429             | 274             | 326             | 233             | 288             |
| <i>B. glumae</i>         | 550 | AU6208                  | NON                 | USA          | 243                          | 305             | 394             | 251             | 296             | 210             | 269             |
| <i>B. graminis</i>       | 501 | LMG 18924 <sup>T</sup>  | ENV                 | France       | 266                          | 292             | 430             | 275             | 327             | 234             | 289             |
| <i>B. hospital</i>       | 560 | LMG 20598 <sup>T</sup>  | ENV                 | Belgium      | 276                          | 304             | 441             | 286             | 338             | 243             | 299             |
| <i>B. lata</i>           | 98  | AU6262                  | NON                 | USA          | 61                           | 84              | 82              | 65              | 43              | 55              | 77              |
| <i>B. metallica</i>      | 511 | AU0553 <sup>T</sup>     | CF                  | USA          | 239                          | 189             | 268             | 187             | 202             | 153             | 242             |
| <i>B. mimosarum</i>      | 503 | LMG 23256 <sup>T</sup>  | ENV                 | Taiwan       | 271                          | 297             | 435             | 280             | 333             | 237             | 294             |
| <i>B. multivorans</i>    | 534 | AU0485                  | CF                  | USA          | 238                          | 141             | 387             | 248             | 293             | 96              | 302             |
| <i>B. oklahomensis</i>   | 549 | LMG 23618 <sup>T</sup>  | ENV                 | USA          | 270                          | 296             | 434             | 279             | 332             | 236             | 313             |
| <i>B. phenoliruptrix</i> | 507 | LMG 22037 <sup>T</sup>  | ENV                 | Unknown      | 275                          | 302             | 440             | 285             | 337             | 242             | 298             |
| <i>B. phymatum</i>       | 504 | LMG 21445               | ENV                 | Fr. Guiana   | 272                          | 298             | 436             | 281             | 334             | 238             | 295             |
| <i>B. phytofirmans</i>   | 502 | LMG 22487               | ENV                 | Germany      | 269                          | 295             | 433             | 278             | 331             | 235             | 293             |
| <i>B. plantarii</i>      | 559 | LMG 9035                | ENV                 | Japan        | 246                          | 311             | 401             | 253             | 329             | 211             | 291             |
| <i>B. pyrrocinia</i>     | 93  | AU2419                  | NON                 | USA          | 50                           | 37              | 93              | 35              | 76              | 25              | 34              |
|                          | 94  | R-13543                 | EVN                 | USA          | 49                           | 89              | 30              | 91              | 107             | 24              | 33              |
|                          | 95  | ATCC 39277              | EVN                 | USA          | 46                           | 36              | 116             | 107             | 97              | 92              | 85              |
|                          |     | <b>ZJ9</b>              | <b>Soil</b>         | <b>China</b> | <b>OK255672</b>              | <b>OK255677</b> | <b>OK255680</b> | <b>OK255693</b> | <b>OK255687</b> | <b>OK255690</b> | <b>OK255698</b> |
|                          |     | <b>ZJ174</b>            | <b>Soil</b>         | <b>China</b> | <b>OK255673</b>              | <b>OK255678</b> | <b>OK255681</b> | <b>OK255694</b> | <b>OK255688</b> | <b>OK255691</b> | <b>OK255699</b> |
| <i>B. sacchari</i>       | 548 | LMG 19450 <sup>T</sup>  | ENV                 | Brazil       | 268                          | 294             | 432             | 277             | 330             | 247             | 292             |
| <i>B. seminalis</i>      | 473 | AU0475 <sup>T</sup>     | CF                  | USA          | 203                          | 161             | 386             | 144             | 286             | 123             | 240             |
| <i>B. species</i>        | 538 | AU10475                 | NON                 | USA          | 248                          | 277             | 405             | 255             | 304             | 215             | 307             |
| <i>B. stabilis</i>       | 480 | AU6735                  | NON                 | USA          | 25                           | 69              | 61              | 109             | 298             | 10              | 62              |
| <i>B. stabilis</i>       | 50  | LMG 14294               | CF                  | Belgium      | 26                           | 18              | 14              | 21              | 70              | 10              | 16              |
| <i>B. stabilis</i>       | 53  | BCC0717                 | CF                  | UK           | 25                           | 69              | 61              | 109             | 70              | 10              | 62              |
| <i>B. thailandensis</i>  | 488 | AU13555                 | NON                 | USA          | 253                          | 278             | 411             | 261             | 311             | 220             | 277             |
| <i>B. tropica</i>        | 490 | AU15822                 | NON                 | USA          | 255                          | 280             | 413             | 263             | 313             | 223             | 279             |
| <i>B. tuberum</i>        | 506 | LMG 21444 <sup>T</sup>  | ENV                 | South Africa | 274                          | 301             | 439             | 284             | 336             | 241             | 297             |
| <i>B. ubonensis</i>      | 299 | LMG 20358 <sup>T</sup>  | ENV                 | Thailand     | 137                          | 229             | 200             | 216             | 243             | 177             | 153             |
| <i>B. vietnamiensis</i>  | 475 | AU3251                  | CF                  | USA          | 27                           | 19              | 390             | 23              | 35              | 187             | 268             |
| <i>B. kururiensis</i>    | 547 | LMG 19447 <sup>T</sup>  | ENV                 | Japan        | 267                          | 293             | 431             | 276             | 328             | 246             | 290             |

Bcc: *Burkholderia cepacia* complex; T: type strain; CF: patient with cystic fibrosis; NON: patient without cystic fibrosis; ENV, environmental isolate.
